# Supplementary material for: Phenotype control techniques for Boolean gene regulatory networks
Source: PubMed Central journal article supplement — bioRxiv. 2023 Apr 18:2023.04.17.537158. Preprint. [Version 1] doi: 10.1101/2023.04.17.537158 (PMC10153207; doi:10.1101/2023.04.17.537158), 2023-04-18
Supplement: NIHPP2023.04.17.537158v1-supplement-1.pdf [file NIHPP2023.04.17.537158v1-supplement-1.pdf]

## 7.5 Supplementary Tables

Table 7: Small T-LGL rules

| Node      | Boolean Rule                     |
|-----------|----------------------------------|
| S1P       | (not Ceramide)                   |
| FLIP      | (not DISC)                       |
| Fas       | (not S1P)                        |
| Ceramide  | Fas and (not S1P)                |
| DISC      | Ceramide or (Fas and (not FLIP)) |
| Apoptosis | DISC                             |

Table 8: Functions for large T-LGL model.

| Node                   | Rule                                                      |
|------------------------|-----------------------------------------------------------|
| CTLA4                  | TCR                                                       |
| TCR                    | Stimuli and not CTLA4                                     |
| PDGFR                  | S1P or PDGF                                               |
| FYN                    | TCR or IL2RB                                              |
| Cytoskeleton_signaling | FYN                                                       |
| LCK                    | CD45 or ((TCR or IL2RB) and not ZAP70)                    |
| ZAP70                  | LCK and not FYN                                           |
| GRB2                   | IL2RB or ZAP70                                            |
| PLCG1                  | GRB2 or PDGFR                                             |
| KRAS                   | (GRB2 or PLCG1) and not GAP                               |
| GAP                    | (KRAS or (PDGFR and GAP)) and not (IL15 or IL2)           |
| MEK                    | KRAS                                                      |
| ERK                    | MEK and PI3K                                              |
| PI3K                   | PDGFR or KRAS                                             |
| NFKB                   | (TPL2 or PI3K) or (FLIP and TRADD and IAP)                |
| NFAT                   | PI3K                                                      |
| RANTES                 | NFKB                                                      |
| IL2                    | (NFKB or STAT3 or NFAT) and not TBET                      |
| IL2RBT                 | ERK and TBET                                              |
| IL2RB                  | IL2RBT and (IL2 or IL15)                                  |
| IL2RAT                 | IL2 and (STAT3 or NFKB)                                   |
| IL2RA                  | (IL2 and IL2RAT) and not IL2RA                            |
| JAK                    | (IL2RA or IL2RB or RANTES or IFNG) and not (SOCS or CD45) |
| SOCS                   | JAK and not (IL2 or IL15)                                 |
| STAT3                  | JAK                                                       |
| P27                    | STAT3                                                     |
| Proliferation          | STAT3 and not P27                                         |
| TBET                   | JAK or TBET                                               |
| CREB                   | ERK and IFNG                                              |
| IFNGT                  | TBET or STAT3 or NFAT                                     |
| IFNG                   | ((IL2 or IL15 or Stimuli) and IFNGT) and not (SMAD or P2) |
| P2                     | (IFNG or P2) and not Stimuli2                             |
| GZMB                   | (CREB and IFNG) or TBET                                   |
| TPL2                   | TAX or (PI3K and TNF)                                     |
| TNF                    | NFKB                                                      |
| TRADD                  | TNF and not (IAP or A20)                                  |
| FasL                   | STAT3 or NFKB or NFAT or ERK                              |
| FasT                   | NFKB                                                      |

|           |                                                            |
|-----------|------------------------------------------------------------|
| Fas       | (FasT and FasL) and not sFas                               |
| sFas      | FasT and S1P                                               |
| Ceramide  | Fas and not S1P                                            |
| DISC      | FasT and ((Fas and IL2) or Ceramide or (Fas and not FLIP)) |
| Caspase   | ((TRADD or GZMB) and BID) and not IAP) or DISC             |
| FLIP      | (NFkB or (CREB and IFNG)) and not DISC                     |
| A20       | NFkB                                                       |
| BID       | (Caspase or GZMB) and not (BclxL or MCL1)                  |
| IAP       | NFkB and not BID                                           |
| BclxL     | (NFkB or STAT3) and not (BID or GZMB or DISC)              |
| MCL1      | (IL2RB and STAT3 and NFkB and PI3K) and not DISC           |
| Apoptosis | Caspase                                                    |
| GPCR      | S1P                                                        |
| SMAD      | GPCR                                                       |
| SPHK1     | PDGFR                                                      |
| S1P       | SPHK1 and not Ceramide                                     |
| PDGF      | 0                                                          |
| IL15      | 1                                                          |
| Stimuli   | 1                                                          |
| Stimuli2  | 0                                                          |
| CD45      | 0                                                          |
| TAX       | 0                                                          |
